# Supplementary material
Source: PubMed Central journal article supplement (PMC1308928)

# Zfp312-like ISH

Neocortex

Thalamus

Striatum

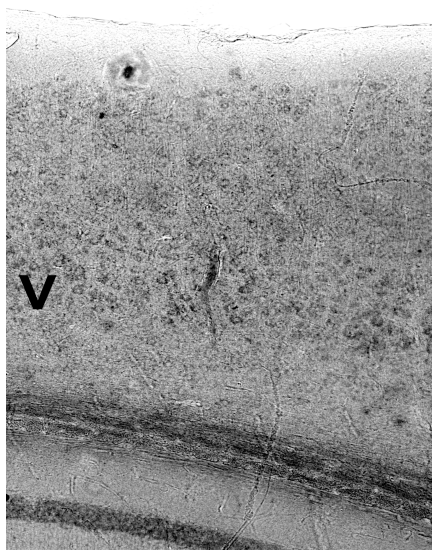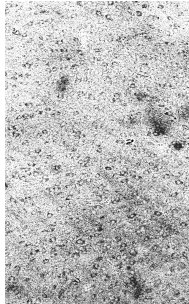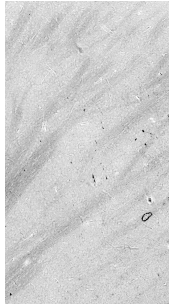

Hippocampus

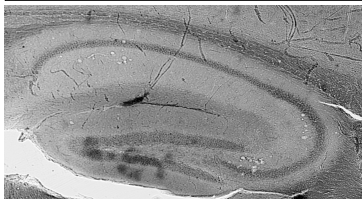

Human Zfp312 MASS-ASLE<sup>T</sup>MVPPACPRAG-----ASPAT<sup>S</sup>SKTLAFS<sup>I</sup>ERIMAKT<sup>S</sup>EP<sup>R</sup>APFEPRPAGAL  
 Mouse Zfp312 MASS-ASLE<sup>T</sup>MVPPACPRAG-----ASPAT<sup>S</sup>SKTLAFS<sup>I</sup>ERIMAKT<sup>S</sup>EP<sup>R</sup>APFEPRPAAL  
 Xenopus Zfp312 MA-----APLET<sup>V</sup>TMTPCQRFDGR----NGASAT<sup>P</sup>KSLAFS<sup>I</sup>ERIMAKT<sup>S</sup>EP<sup>K</sup>AAAFQPSQGL  
 Human Zfp312-like MDSSCHNAT<sup>T</sup>KMLATAPARGN-----MMST<sup>S</sup>KPLAFS<sup>I</sup>ERIMART<sup>P</sup>EP<sup>K</sup>ALVPVPHFLQG  
 Mouse Zfp312-like MDSSCLNAT<sup>T</sup>KMLATAPARGN-----VMST<sup>S</sup>KPLAFS<sup>I</sup>ERIMART<sup>P</sup>EP<sup>K</sup>ALVPVPHFLQG  
 Xenopus Zfp312-like MDSSLQHK<sup>T</sup>TKIFPSQASRDSLSNRVTMISGAK<sup>P</sup>LAFS<sup>I</sup>ERIM<sup>S</sup>RT<sup>P</sup>EP<sup>K</sup>CLVPVPSLLQG

Human Zfp312 EADGSQ<sup>G</sup>KKLLNLCSP-LPCMI<sup>P</sup>LQPLGYE<sup>V</sup>PSK<sup>T</sup>LLSYSELW<sup>K</sup>SSLRAGGGGGGGGGGG  
 Mouse Zfp312 EADSSQ<sup>S</sup>KKLLNLCSP-LPCMI<sup>P</sup>LQPLGYE<sup>V</sup>PSK<sup>T</sup>LLSYSE<sup>F</sup>W<sup>K</sup>SSLRAGGGGGGGGS---  
 Xenopus Zfp312 DPGA---KKMLNLCSP-LPCMI<sup>P</sup>LQSLAYDVH<sup>S</sup>KALLNYS<sup>E</sup>LW<sup>K</sup>SSLRG-----  
 Human Zfp312-like ALPKGEP<sup>K</sup>HSLHLN<sup>S</sup>S-IPCMIP<sup>F</sup>VVAYD<sup>T</sup>SPKAGV<sup>T</sup>GSEPR<sup>K</sup>ASLEAPA<sup>A</sup>PAAVP---  
 Mouse Zfp312-like AVPKGDP<sup>K</sup>HSLHLN<sup>S</sup>S-IPCMIP<sup>F</sup>VVAYD<sup>T</sup>NSKAGV<sup>N</sup>GSEPR<sup>K</sup>ASLEVPAP<sup>A</sup>PAVAP---  
 Xenopus Zfp312-like SVPKGD<sup>Q</sup>KQALHIN<sup>S</sup>SSIPCMIP<sup>F</sup>VVAYD<sup>H</sup>CPK<sup>T</sup>IGS<sup>A</sup>E<sup>L</sup>RK<sup>S</sup>HLD-----

Human Zfp312 GGGGAP<sup>V</sup>CGASGLCKT<sup>N</sup>CGVCC<sup>K</sup>AE<sup>L</sup>GLAP<sup>S</sup>ALPAGRV<sup>I</sup>KPQVIN<sup>Q</sup>AVGLPAS<sup>G</sup>SLYYF  
 Mouse Zfp312 ---GGGAP<sup>V</sup>CGASGLCKT<sup>N</sup>CGVCC<sup>K</sup>AE<sup>L</sup>GLAP<sup>S</sup>ALPAGRV<sup>I</sup>KPQVIN<sup>Q</sup>AVGLPAS<sup>G</sup>SLYYF  
 Xenopus Zfp312 -----SVCSP<sup>S</sup>GLCKSN<sup>C</sup>GICCKNDLNM<sup>G</sup>HTVLP<sup>G</sup>SRV<sup>I</sup>KPQVIN<sup>Q</sup>TVGLPT<sup>N</sup>GS<sup>L</sup>YYF  
 Human Zfp312-like -----SAPAF<sup>S</sup>CDLLN<sup>C</sup>ALSLK<sup>G</sup>D<sup>L</sup>ARDAL<sup>P</sup>LQ<sup>Y</sup>KLVR<sup>P</sup>RVVNH<sup>S</sup>SFHAM<sup>G</sup>A-LCYL  
 Mouse Zfp312-like -----SAPAF<sup>S</sup>CDLLN<sup>C</sup>ALSLK<sup>G</sup>D<sup>L</sup>ARDAL<sup>P</sup>LQ<sup>Y</sup>KLVR<sup>P</sup>RVVNH<sup>S</sup>SFHAM<sup>G</sup>A-LCYL  
 Xenopus Zfp312-like -----SSPP<sup>F</sup>SCNDLLN<sup>C</sup>ALTLK<sup>G</sup>DFPREAL<sup>P</sup>LQ<sup>Y</sup>KLVR<sup>P</sup>RVVNH<sup>S</sup>SFHAM<sup>G</sup>A<sup>A</sup>FCYF

Human Zfp312 NYLDSTAY<sup>P</sup>PSSELL<sup>G</sup>HLP<sup>S</sup>GLLNAQAPAA<sup>L</sup>AHPK<sup>F</sup>LLEN<sup>A</sup>KLAGLA<sup>A</sup>DK<sup>F</sup>PH<sup>P</sup>AY  
 Mouse Zfp312 NYLDSTAY<sup>P</sup>PSSELL<sup>G</sup>HLP<sup>S</sup>GLLNAQAPT<sup>S</sup>LA<sup>A</sup>HPK<sup>F</sup>LLEN<sup>A</sup>KLASLA<sup>A</sup>DK<sup>F</sup>PH<sup>P</sup>ASY  
 Xenopus Zfp312 NYLDS<sup>S</sup>F<sup>H</sup>PP-EILSQ<sup>L</sup>LSS<sup>S</sup>LINAQ<sup>S</sup>QATLSA<sup>Q</sup>KL<sup>F</sup>LLEN<sup>A</sup>KLSGLA<sup>P</sup>E<sup>K</sup>FP<sup>N</sup>P-QY  
 Human Zfp312-like NRGD<sup>G</sup>CP<sup>H</sup>PA-ASVNI<sup>H</sup>HPV<sup>A</sup>S<sup>F</sup>PLSSP----LHPQ<sup>K</sup>TYLA<sup>E</sup>RN<sup>K</sup>L<sup>V</sup>VPA<sup>V</sup>E<sup>K</sup>Y<sup>P</sup>SG--V  
 Mouse Zfp312-like NRGD<sup>G</sup>CP<sup>H</sup>PA-ASVNI<sup>H</sup>HPV<sup>A</sup>S<sup>F</sup>PLSSP----LHPQ<sup>K</sup>TYLA<sup>E</sup>RN<sup>K</sup>L<sup>V</sup>VPA<sup>V</sup>E<sup>K</sup>Y<sup>P</sup>SG--V  
 Xenopus Zfp312-like NRGDS<sup>Q</sup>CH<sup>P</sup>P-ASINI<sup>H</sup>HPV<sup>A</sup>S<sup>F</sup>PLGSP----LHQ<sup>A</sup>PK<sup>S</sup>YLA<sup>E</sup>RN<sup>K</sup>L<sup>V</sup>LP<sup>S</sup>VE<sup>K</sup>F<sup>S</sup>SG--V

Human Zfp312 PHKERL<sup>P</sup>APLE<sup>Q</sup>V<sup>L</sup>KENSAL<sup>T</sup>AERGG<sup>V</sup>K<sup>G</sup>HS<sup>K</sup>LPG<sup>S</sup>ADG<sup>K</sup>PK<sup>N</sup>FT<sup>E</sup>CVCG<sup>K</sup>VFN<sup>A</sup>HYNL  
 Mouse Zfp312 PHKERL<sup>H</sup>APLE<sup>Q</sup>V<sup>L</sup>KENSAL<sup>T</sup>AERGG<sup>V</sup>K<sup>S</sup>HS<sup>K</sup>LPG<sup>S</sup>TD<sup>S</sup>K<sup>P</sup>KN<sup>F</sup>TE<sup>C</sup>EVCG<sup>K</sup>VFN<sup>A</sup>HYNL  
 Xenopus Zfp312 PHKERL<sup>P</sup>Q<sup>L</sup>D<sup>Q</sup>VMKENSAL<sup>S</sup>ADR<sup>S</sup>G-KI<sup>H</sup>SK<sup>L</sup>GAN<sup>S</sup>AEG<sup>K</sup>PK<sup>I</sup>FT<sup>E</sup>CVCG<sup>K</sup>VFN<sup>A</sup>HYNL  
 Human Zfp312-like AFK<sup>D</sup>LSQA<sup>L</sup>Q<sup>H</sup>YMK<sup>E</sup>SA<sup>Q</sup>LLSE<sup>K</sup>IA<sup>F</sup>K<sup>T</sup>S-DF<sup>S</sup>RG<sup>S</sup>PN<sup>A</sup>K<sup>P</sup>V<sup>F</sup>TE<sup>C</sup>EVCG<sup>K</sup>VFN<sup>A</sup>HYNL  
 Mouse Zfp312-like AFK<sup>D</sup>LSQA<sup>L</sup>Q<sup>H</sup>YMK<sup>E</sup>SA<sup>Q</sup>LLSE<sup>K</sup>IA<sup>F</sup>K<sup>T</sup>S-DF<sup>S</sup>RG<sup>S</sup>PN<sup>A</sup>K<sup>P</sup>V<sup>F</sup>TE<sup>C</sup>EVCG<sup>K</sup>VFN<sup>A</sup>HYNL  
 Xenopus Zfp312-like TFK<sup>D</sup>LSQA<sup>L</sup>Q<sup>F</sup>Q<sup>H</sup>YMK<sup>E</sup>GA<sup>H</sup>SL<sup>D</sup>KIT<sup>F</sup>K<sup>T</sup>SA<sup>F</sup>SSA<sup>S</sup>PN<sup>K</sup>PK<sup>V</sup>FT<sup>E</sup>CVCG<sup>K</sup>VFN<sup>A</sup>HYNL

Human Zfp312 TRHMPVHT<sup>G</sup>ARPFV<sup>C</sup>KVCG<sup>G</sup>KFRQ<sup>A</sup>STLCR<sup>H</sup>KI<sup>I</sup>HTQ<sup>E</sup>KPH<sup>K</sup>CN<sup>Q</sup>CGK<sup>A</sup>FN<sup>R</sup>SSTLN<sup>T</sup>HI  
 Mouse Zfp312 TRHMPVHT<sup>G</sup>ARPFV<sup>C</sup>KVCG<sup>G</sup>KFRQ<sup>A</sup>STLCR<sup>H</sup>KI<sup>I</sup>HTQ<sup>E</sup>KPH<sup>K</sup>CN<sup>Q</sup>CGK<sup>A</sup>FN<sup>R</sup>SSTLN<sup>T</sup>HI  
 Xenopus Zfp312 TRHMPVHT<sup>G</sup>ARPFV<sup>C</sup>KVCG<sup>G</sup>KFRQ<sup>A</sup>STLCR<sup>H</sup>KI<sup>I</sup>HTQ<sup>E</sup>KPH<sup>K</sup>CN<sup>Q</sup>CGK<sup>A</sup>FN<sup>R</sup>SSTLN<sup>T</sup>HI  
 Human Zfp312-like TRHMPVHT<sup>G</sup>ARPFV<sup>C</sup>KVCG<sup>G</sup>KFRQ<sup>A</sup>STLCR<sup>H</sup>KI<sup>I</sup>HTQ<sup>E</sup>KPH<sup>K</sup>CN<sup>Q</sup>CGK<sup>A</sup>FN<sup>R</sup>SSTLN<sup>T</sup>HT  
 Mouse Zfp312-like TRHMPVHT<sup>G</sup>ARPFV<sup>C</sup>KVCG<sup>G</sup>KFRQ<sup>A</sup>STLCR<sup>H</sup>KI<sup>I</sup>HTQ<sup>E</sup>KPH<sup>K</sup>CN<sup>Q</sup>CGK<sup>A</sup>FN<sup>R</sup>SSTLN<sup>T</sup>HT  
 Xenopus Zfp312-like TRHMPVHT<sup>G</sup>ARPFV<sup>C</sup>KIC<sup>G</sup>GKFRQ<sup>A</sup>STLCR<sup>H</sup>KI<sup>I</sup>HTQ<sup>E</sup>KPH<sup>K</sup>CN<sup>Q</sup>CGK<sup>A</sup>FN<sup>R</sup>SSTLN<sup>T</sup>HT

Human Zfp312 RIHAGYK<sup>P</sup>PFVCE<sup>F</sup>CGK<sup>G</sup>GFHQ<sup>K</sup>GNYK<sup>N</sup>HKL<sup>T</sup>HSGE<sup>K</sup>Q<sup>Y</sup>K<sup>T</sup>IC<sup>N</sup>KAF<sup>H</sup>Q<sup>V</sup>YNLT<sup>F</sup>PHM<sup>H</sup>THN  
 Mouse Zfp312 RIHAGYK<sup>P</sup>PFVCE<sup>F</sup>CGK<sup>G</sup>GFHQ<sup>K</sup>GNYK<sup>N</sup>HKL<sup>T</sup>HSGE<sup>K</sup>Q<sup>Y</sup>K<sup>T</sup>IC<sup>N</sup>KAF<sup>H</sup>Q<sup>V</sup>YNLT<sup>F</sup>PHM<sup>H</sup>THN  
 Xenopus Zfp312 RIHAGYK<sup>P</sup>PFVCE<sup>F</sup>CGK<sup>G</sup>GFHQ<sup>K</sup>GNYK<sup>N</sup>HKL<sup>T</sup>HSGE<sup>K</sup>Q<sup>Y</sup>K<sup>T</sup>IC<sup>N</sup>KAF<sup>H</sup>Q<sup>I</sup>YNLT<sup>F</sup>PHM<sup>H</sup>THN  
 Human Zfp312-like RIHAGYK<sup>P</sup>PFVCE<sup>F</sup>CGK<sup>G</sup>GFHQ<sup>K</sup>GNYK<sup>N</sup>HKL<sup>T</sup>HSGE<sup>K</sup>Q<sup>F</sup>K<sup>N</sup>IC<sup>N</sup>KAF<sup>H</sup>Q<sup>V</sup>YNLT<sup>F</sup>PHM<sup>H</sup>THN  
 Mouse Zfp312-like RIHAGYK<sup>P</sup>PFVCE<sup>F</sup>CGK<sup>G</sup>GFHQ<sup>K</sup>GNYK<sup>N</sup>HKL<sup>T</sup>HSGE<sup>K</sup>Q<sup>F</sup>K<sup>N</sup>IC<sup>N</sup>KAF<sup>H</sup>Q<sup>V</sup>YNLT<sup>F</sup>PHM<sup>H</sup>THN  
 Xenopus Zfp312-like RIHAGYK<sup>P</sup>PFVCE<sup>F</sup>CGK<sup>G</sup>GFHQ<sup>K</sup>GNYK<sup>N</sup>HKL<sup>T</sup>HSGE<sup>K</sup>Q<sup>F</sup>K<sup>N</sup>IC<sup>N</sup>KAF<sup>H</sup>Q<sup>I</sup>YNLT<sup>F</sup>PHM<sup>H</sup>THN

Human Zfp312 DKKP<sup>F</sup>TCATCG<sup>G</sup>K<sup>G</sup>FCRN<sup>F</sup>DLK<sup>H</sup>VR<sup>K</sup>LH<sup>D</sup>SVG<sup>P</sup>AA-PSAK<sup>D</sup>LTR<sup>T</sup>VQ<sup>S</sup>-----  
 Mouse Zfp312 DKKP<sup>F</sup>TCATCG<sup>G</sup>K<sup>G</sup>FCRN<sup>F</sup>DLK<sup>H</sup>VR<sup>K</sup>LH<sup>D</sup>SVG<sup>P</sup>TAT<sup>P</sup>SAK<sup>D</sup>LART<sup>V</sup>Q<sup>S</sup>-----  
 Xenopus Zfp312 DKKP<sup>F</sup>TCG<sup>T</sup>CG<sup>G</sup>K<sup>G</sup>FCRN<sup>F</sup>DLK<sup>H</sup>VR<sup>K</sup>LH<sup>D</sup>NVSS<sup>C</sup>--SLKE<sup>I</sup>SRT<sup>G</sup>S-----  
 Human Zfp312-like DKKP<sup>F</sup>TC<sup>T</sup>CG<sup>G</sup>K<sup>G</sup>FCRN<sup>F</sup>DLK<sup>H</sup>VR<sup>K</sup>LH<sup>D</sup>SSLGL<sup>A</sup>RT<sup>P</sup>AGE<sup>P</sup>TE<sup>P</sup>PP<sup>L</sup>PP<sup>Q</sup>PP<sup>M</sup>TL<sup>P</sup>P  
 Mouse Zfp312-like DKKP<sup>F</sup>TC<sup>T</sup>CG<sup>G</sup>K<sup>G</sup>FCRN<sup>F</sup>DLK<sup>H</sup>VR<sup>K</sup>LH<sup>D</sup>SSLGL<sup>A</sup>TR<sup>T</sup>PT<sup>G</sup>EP<sup>S</sup>SD<sup>P</sup>PP<sup>Q</sup>Q<sup>Q</sup>PP<sup>A</sup>LP<sup>P</sup>  
 Xenopus Zfp312-like DKKP<sup>F</sup>TC<sup>T</sup>CG<sup>G</sup>K<sup>G</sup>FCRN<sup>F</sup>DLK<sup>H</sup>VR<sup>K</sup>LH<sup>D</sup>SS<sup>L</sup>GL<sup>A</sup>TR<sup>T</sup>PT<sup>G</sup>EP<sup>S</sup>SD<sup>P</sup>PP<sup>Q</sup>Q<sup>Q</sup>PP<sup>A</sup>LP<sup>P</sup>----

Human Zfp312 -----  
 Mouse Zfp312 -----  
 Xenopus Zfp312 -----  
 Human Zfp312-like LQP<sup>L</sup>PT<sup>P</sup>GP<sup>L</sup>Q<sup>L</sup>PL<sup>H</sup>Q<sup>G</sup>H<sup>Q</sup>  
 Mouse Zfp312-like LQP<sup>L</sup>TP<sup>P</sup>PG<sup>L</sup>PS<sup>L</sup>H<sup>Q</sup>G<sup>H</sup>Q  
 Xenopus Zfp312-like ---TIQ<sup>S</sup>P<sup>L</sup>Q<sup>L</sup>Q<sup>S</sup>GY-----

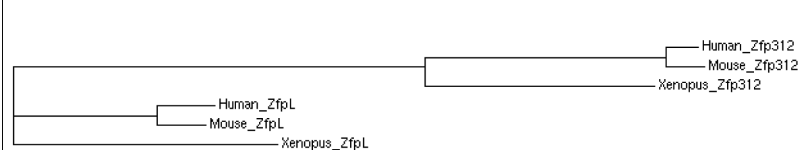

Supplement: pnas_0509032102_7.pdf [file pnas_0509032102_7.pdf]
