# Supplementary material
Source: PubMed Central journal article supplement (PMC1308928)
Supplement: pnas_0509032102_1.pdf [file pnas_0509032102_1.pdf]

A

| Nctx layers II-IV | P     |       |       | P     | P     |       | P     | A     | A   | A   | P   | P   | P   | A   | P   | A   |
|-------------------|-------|-------|-------|-------|-------|-------|-------|-------|-----|-----|-----|-----|-----|-----|-----|-----|
| Nctx layers V-VI  | P     |       | P     | P     | P     | P     | P     | A     | A   | P   | A   | P   | P   | A   | A   | A   |
| Hippocampus       | P     | P     |       |       |       | P     | P     | A     | P   | A   | A   | P   | A   | P   | P   | A   |
| Striatum          | P     | P     |       |       |       |       |       | P     | A   | A   | A   | A   | A   | A   | A   | A   |
| 430A              | 11289 | 13431 | 12444 | 12567 | 12818 | 12015 | 11653 | 11425 | 444 | 168 | 114 | 129 | 94  | 74  | 40  | 53  |
| 430B              | 5049  | 6232  | 6657  | 7254  | 6618  | 6075  | 6023  | 5505  | 188 | 250 | 381 | 216 | 349 | 219 | 184 | 73  |
| Total             | 16338 | 19663 | 19062 | 19821 | 19436 | 17745 | 17676 | 16930 | 632 | 268 | 145 | 345 | 440 | 293 | 224 | 126 |

B

| Striatum | Hippocampus | Upper layer | Lower layer |                                                                 |
|----------|-------------|-------------|-------------|-----------------------------------------------------------------|
|          |             |             |             | BB541620: RIKEN cDNA E130115E03 gene                            |
|          |             |             |             | BI687652: RIKEN cDNA E030026I10 gene                            |
|          |             |             |             | BB391602: RIKEN cDNA 4833444A01 gene                            |
|          |             |             |             | BM115621: ESTs                                                  |
|          |             |             |             | BB254922: UDP-Gal:betaGlcNAc beta 1.3-galactosyltransferase     |
|          |             |             |             | BB150458: weakly similar to ZINC FINGER PROTEIN (FRAGMENT)      |
|          |             |             |             | BE824968: G protein-coupled receptor 22                         |
|          |             |             |             | AW146109: CD44 antigen                                          |
|          |             |             |             | BB100463: RIKEN cDNA E030026I10 gene                            |
|          |             |             |             | AK009282: RIKEN cDNA 2310010M24 gene                            |
|          |             |             |             | AK015212: SRY-box containing gene 5                             |
|          |             |             |             | BI248354: expressed sequence AA536743                           |
|          |             |             |             | BM250266: RIKEN cDNA 9430077C05 gene                            |
|          |             |             |             | BE952082: olfactomedin 1                                        |
|          |             |             |             | BE648447: synaptotaxin 13                                       |
|          |             |             |             | B0174436: cerebellin 1 precursor protein                        |
|          |             |             |             | BB223909: UDP-Gal:betaGlcNAc beta 1.3-galactosyltransferase     |
|          |             |             |             | NM 011920: ATP-binding cassette, sub-family G (WHITE), member 2 |
|          |             |             |             | NM 011102: protein kinase C, gamma                              |
|          |             |             |             | NM 031161:cholecystokinin                                       |
|          |             |             |             | NM 011766: zinc finger protein, multitype 2                     |
|          |             |             |             | AF326561: SH3-domain GRB2-like 2                                |
|          |             |             |             | AK014353: KH domain containing, RNA binding                     |
|          |             |             |             | NM 009717: neurogenic differentiation 6                         |
|          |             |             |             | Y07687: nuclear factor I/B                                      |
|          |             |             |             | BB333334: kit oncogene                                          |
|          |             |             |             | BB477214: ESTs.                                                 |
|          |             |             |             | AK002673: neuropilin                                            |
|          |             |             |             | AV299725: RIKEN cDNA E130115E03 gene                            |
|          |             |             |             | NM 009217: somatostatin receptor 2                              |
|          |             |             |             | BB561008: RIKEN cDNA A730017D01 gene                            |
|          |             |             |             | BM215011: protein kinase C, gamma                               |
|          |             |             |             | BB175669: ESTs.                                                 |
|          |             |             |             | BB769866: ESTs.                                                 |
|          |             |             |             | BC018385: SH3-domain GRB2-like 2                                |
|          |             |             |             | NM 009322: T-box brain gene 1                                   |
|          |             |             |             | AI848492: RIKEN cDNA E130115E03 gene                            |
|          |             |             |             | AK014196: RIKEN cDNA 2810417M05 gene                            |
|          |             |             |             | AA016422: cerebellin 1 precursor protein                        |
|          |             |             |             | NM 019535: SH3-domain GRB2-like 2                               |
|          |             |             |             | B0175176: RIKEN cDNA 2900052E22 gene                            |
|          |             |             |             | NM 009112: calpactin                                            |
|          |             |             |             | BB703394: ESTs                                                  |
|          |             |             |             | B0175909: synaptic vesicle glycoprotein 2 b                     |
|          |             |             |             | B0177394: RIKEN cDNA 1500001L12 gene                            |
|          |             |             |             | AI528773: SRY-box containing gene 5                             |
|          |             |             |             | NM 007733: procollagen, type XIX, alpha 1                       |
|          |             |             |             | NM 080433: zinc finger protein 312                              |
