# Supplementary material
Source: PubMed Central journal article supplement (PMC1308928)

**Total number of basal dendrites**

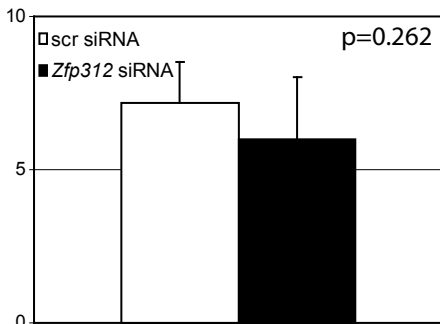

**Total number of bifurcations in basal dendritic tree**

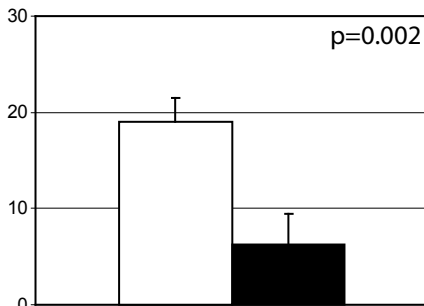

**Total length of basal dendritic tree**

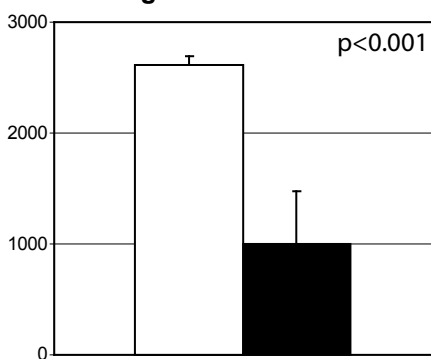

**Total number of dendritic spines on apical dendrite main shaft**

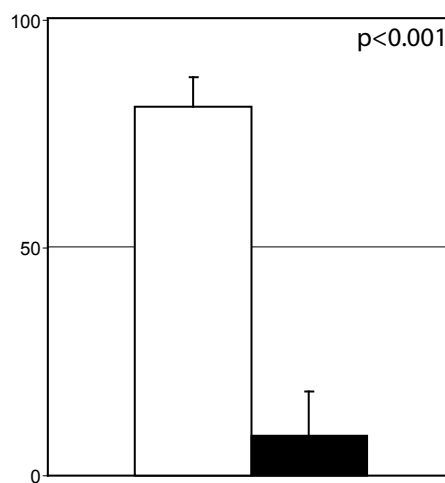

**Total number of apical oblique dendrites**

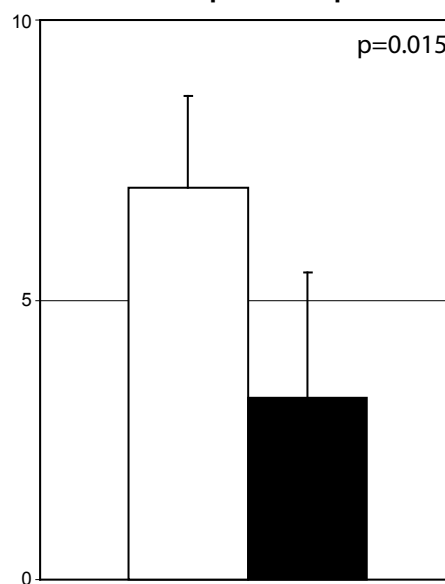

**Total number of bifurcations in apical oblique dendrites**

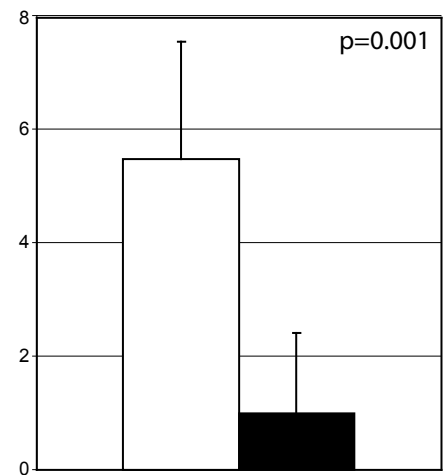

**Total length of apical oblique dendrites**

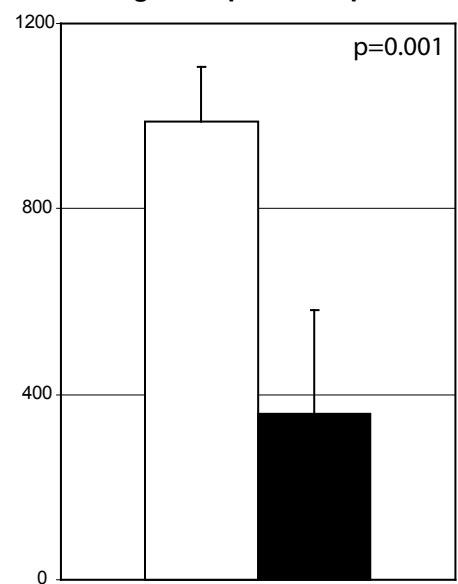

Supplement: pnas_0509032102_4.pdf [file pnas_0509032102_4.pdf]
