# Supplementary material
Source: PubMed Central journal article supplement (PMC1308928)

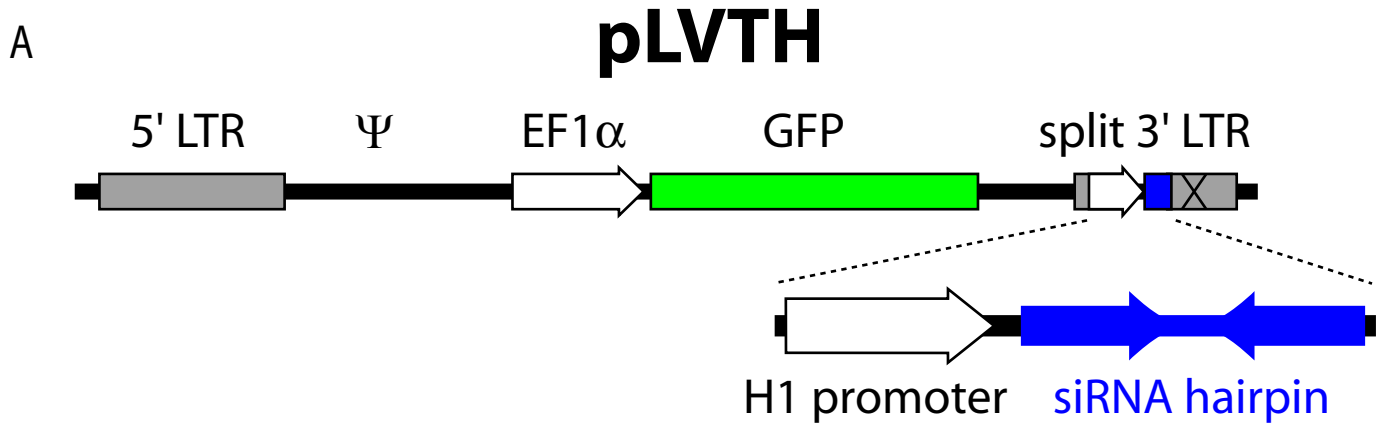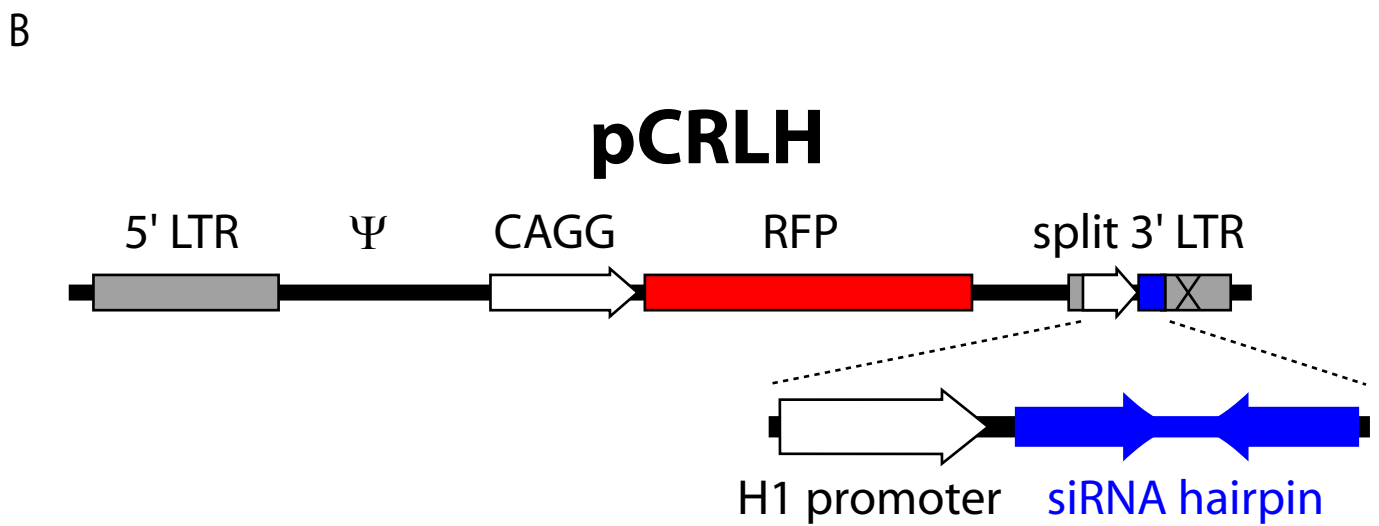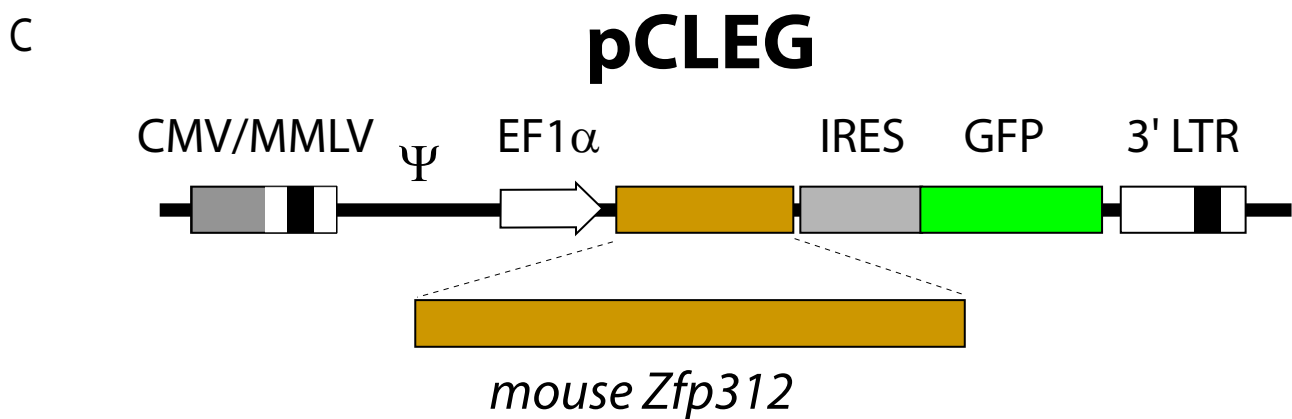

Supplement: pnas_0509032102_2.pdf [file pnas_0509032102_2.pdf]

scr siRNA + GFP TUNEL

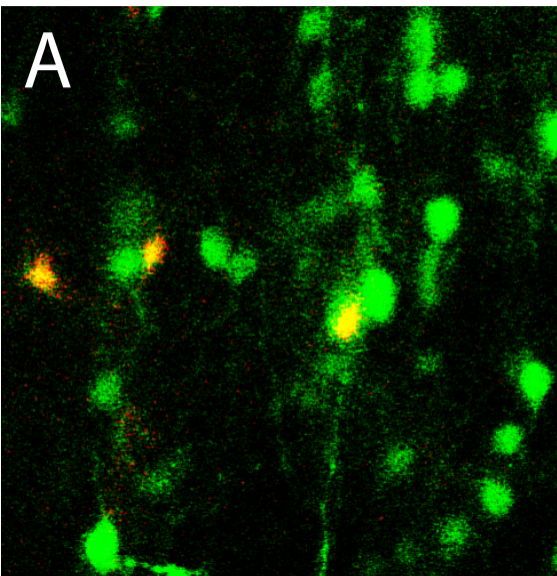

Zfp312 siRNA + GFP TUNEL

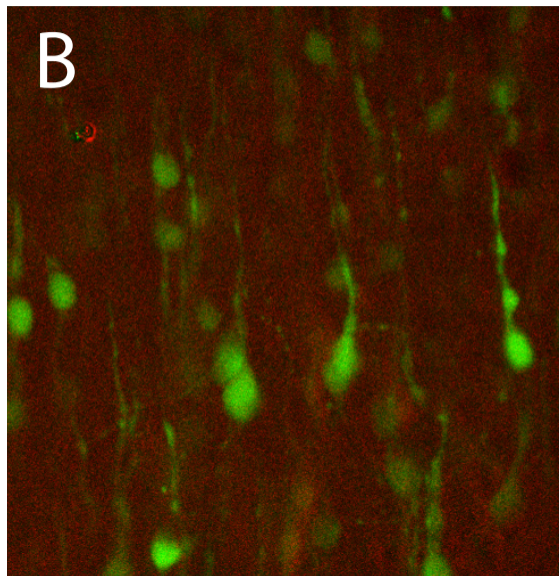

GFP<sup>+</sup> / TUNEL<sup>+</sup>

**C**

□ scr siRNA  
■ *Zfp312* siRNA

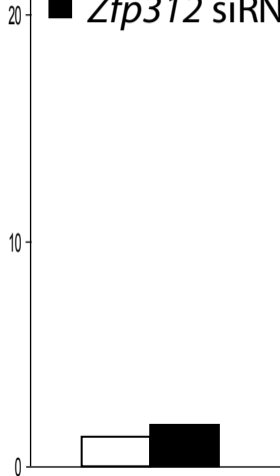

Supplement: pnas_0509032102_3.pdf [file pnas_0509032102_3.pdf]

*in utero* electroporation of pCLEG @ E15.5 → P14

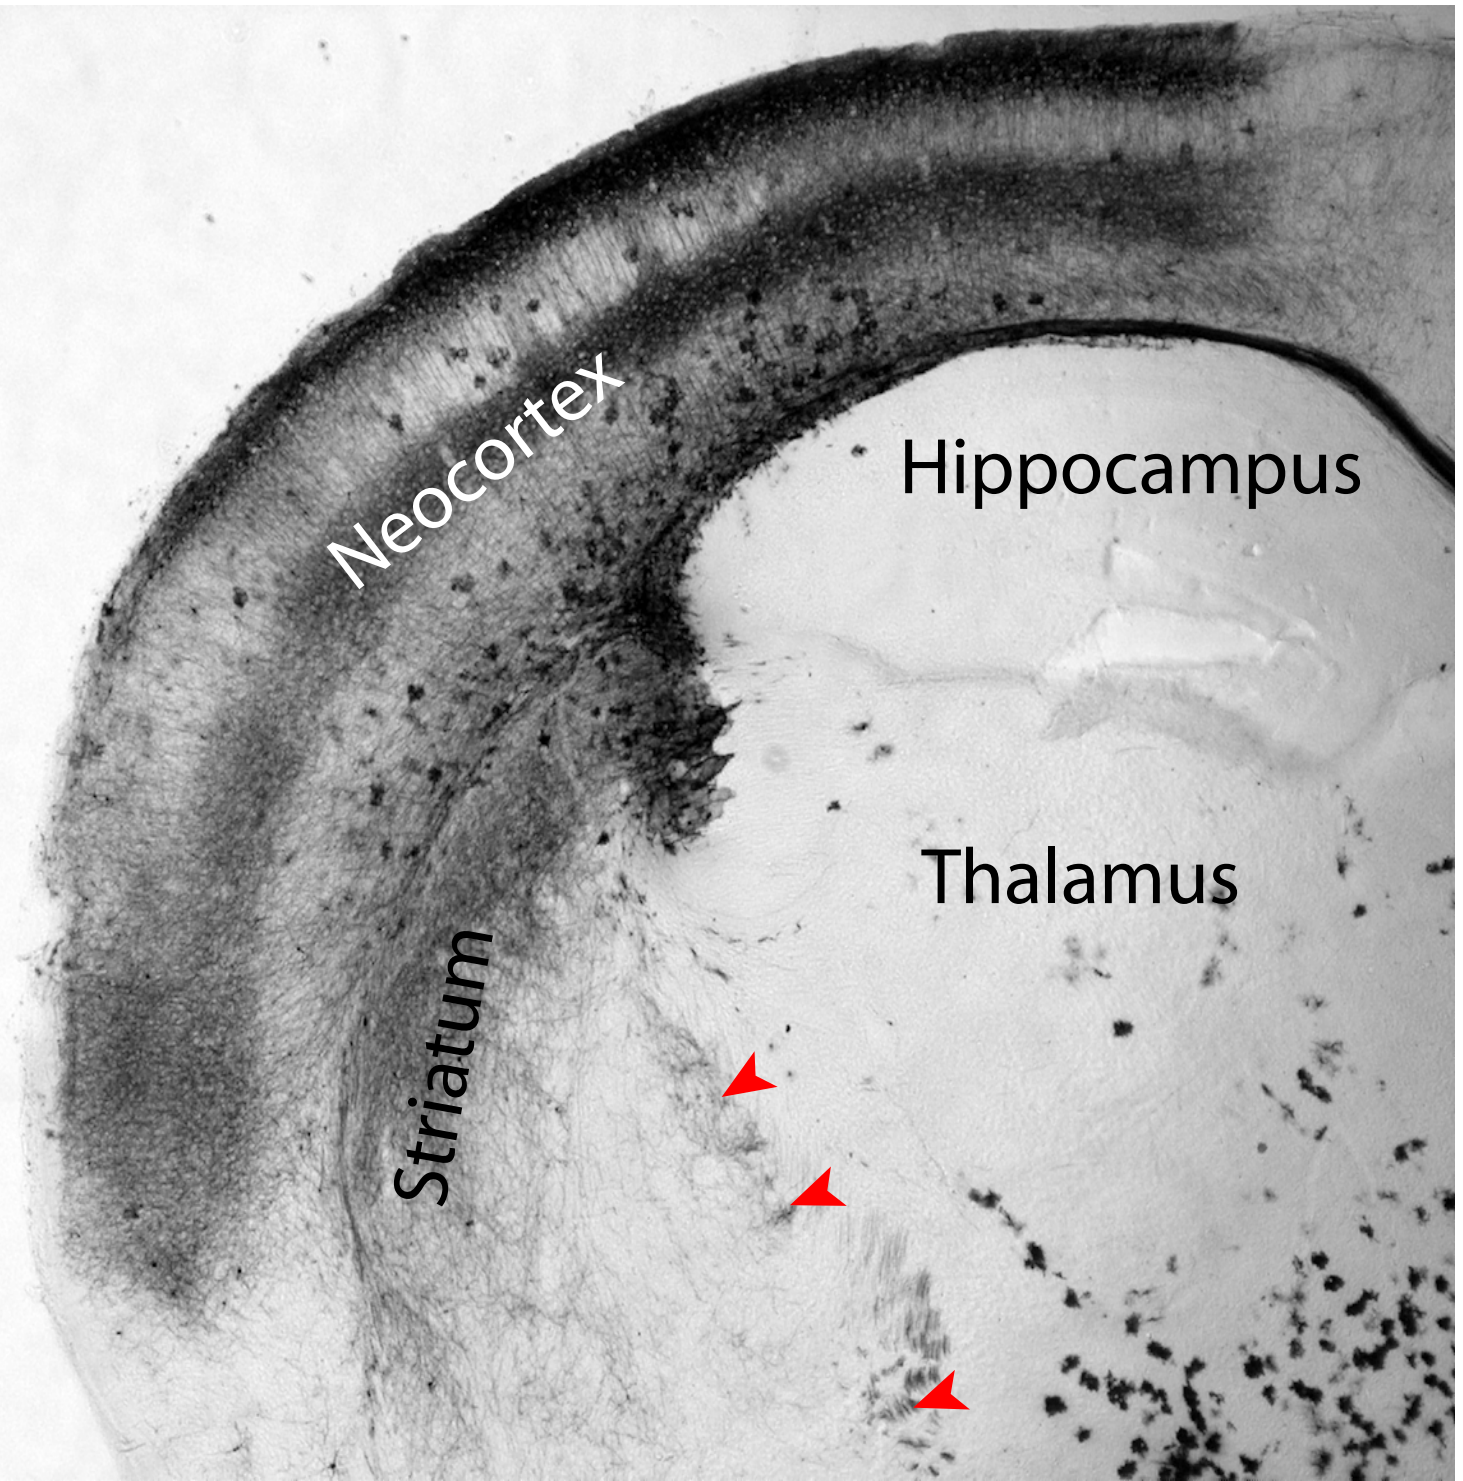

Supplement: pnas_0509032102_5.pdf [file pnas_0509032102_5.pdf]
